# Supplementary material for: Three novel Pseudomonas phages isolated from composting provide insights into the evolution and diversity of tailed phages
Source: PubMed Central journal article supplement (PMC5418858; doi:10.1186/s12864-017-3729-z), 2017-05-04
Supplement: 12864_2017_3729_MOESM5_ESM.pdf [file 12864_2017_3729_MOESM5_ESM.pdf]

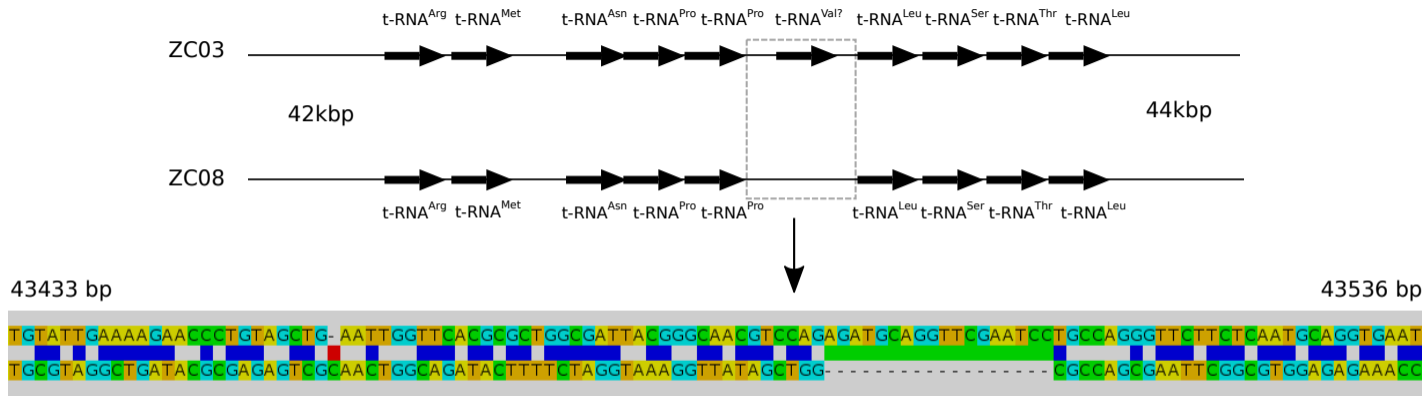

Figure S1: Genomic region with the tRNA genes in ZC03 and ZC08. Region corresponding to the sixth tRNA gene is highlighted due to the differences between the genomes; it may be a pseudogene.
