# Supplementary material for: Three novel Pseudomonas phages isolated from composting provide insights into the evolution and diversity of tailed phages
Source: PubMed Central journal article supplement (PMC5418858; doi:10.1186/s12864-017-3729-z), 2017-05-04
Supplement: 12864_2017_3729_MOESM9_ESM.pdf [file 12864_2017_3729_MOESM9_ESM.pdf]

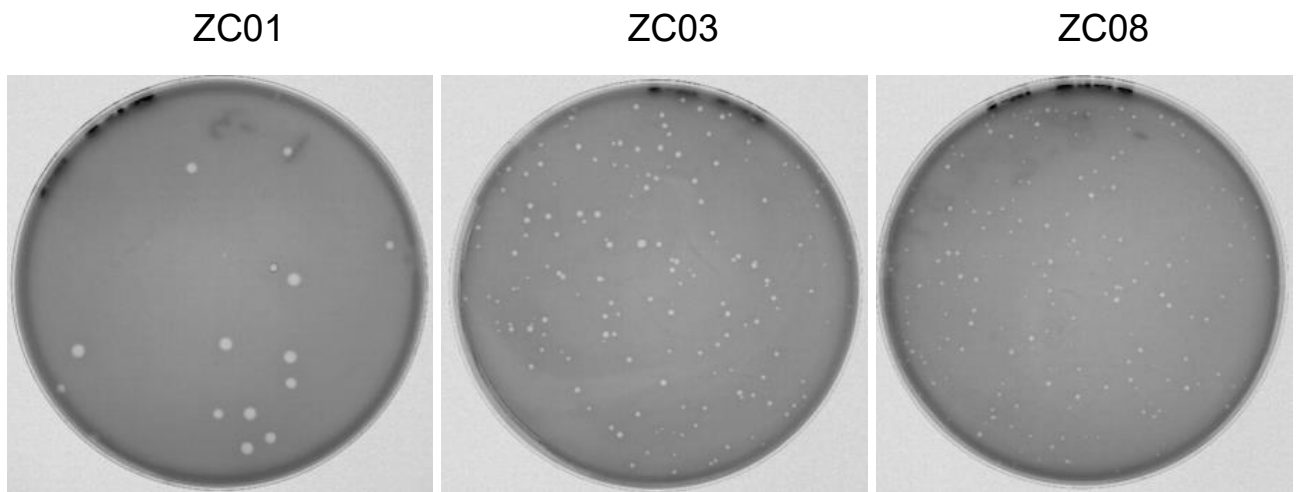

Figure S2. Lysis plaques formed on *P. aeruginosa* PA14 lawn. The same volume of a purified phage suspension and a bacterial overnight culture were mixed with LB top agar and plated in LB-agar. Plates were incubated for 18 h at 37° C after which plaque forming units (PFU) were checked.
