# Supplementary material for: Three novel Pseudomonas phages isolated from composting provide insights into the evolution and diversity of tailed phages
Source: PubMed Central journal article supplement (PMC5418858; doi:10.1186/s12864-017-3729-z), 2017-05-04
Supplement: 12864_2017_3729_MOESM10_ESM.pdf [file 12864_2017_3729_MOESM10_ESM.pdf]

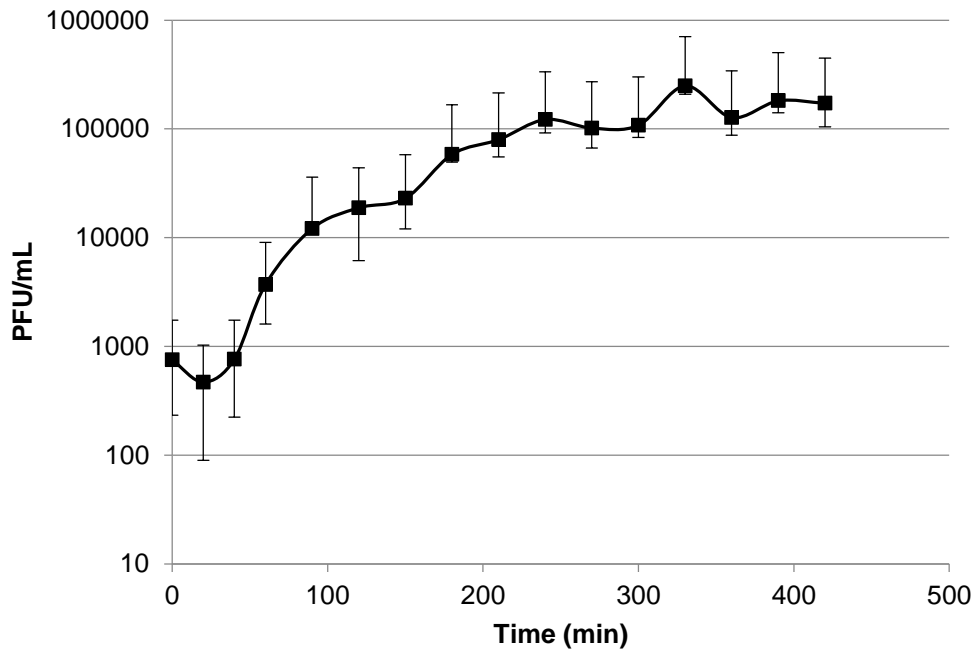

Figure S3: One-step growth curve for phage ZC03 showing a latent period of ~50 min. A plateau is reached at ~240 min and used to calculate the burst size. Bars indicate mean  $\pm$  min/max of three independent experiments.
