# Supplementary material for: Three novel Pseudomonas phages isolated from composting provide insights into the evolution and diversity of tailed phages
Source: PubMed Central journal article supplement (PMC5418858; doi:10.1186/s12864-017-3729-z), 2017-05-04
Supplement: 12864_2017_3729_MOESM11_ESM.pdf [file 12864_2017_3729_MOESM11_ESM.pdf]

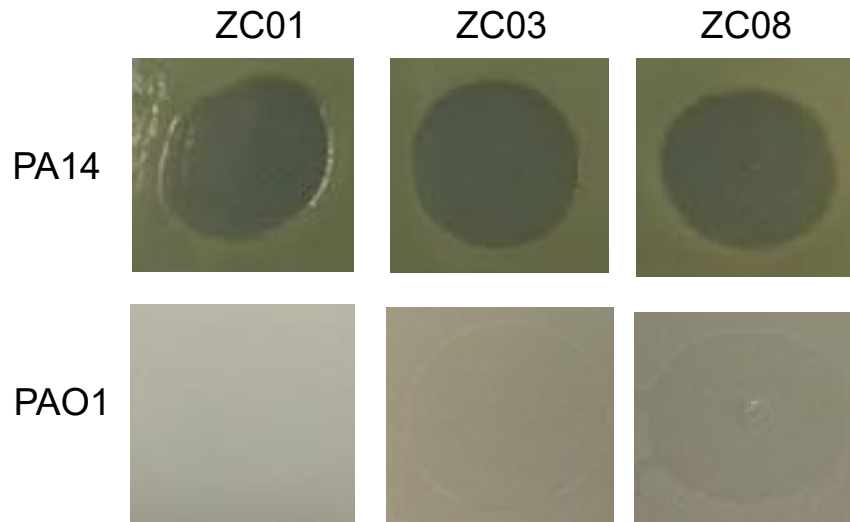

Figure S4: Phage drop test for *P. aeruginosa* PA14 and PAO1 reference strains. Bacterial lawns of *P. aeruginosa* PA14 and PAO1 strains were propagated in LB agar plates by plating 100  $\mu\text{L}$  of overnight cultures and 10  $\mu\text{L}$  droplets of phages ( $10^7$  -  $10^{10}$  PFU  $\text{ml}^{-1}$ ). The plates were incubated 18 h at 37° C and checked for presence of lysis plaques. Only plaques formed with  $10^{10}$  PFU  $\text{ml}^{-1}$  droplets are shown.
